# Supplementary material for: DEP-On-Go for Simultaneous Sensing of Multiple Heavy Metals Pollutants in Environmental Samples
Source: MDPI journal article supplement (doi:10.3390/s17010045), 2016-12-27
Supplement: s1 [file s1]

# Supplementary Materials: DEP-On-Go for Simultaneous Sensing of Multiple Heavy Metals Pollutants in Environmental Samples

Madhu Biyani, Radhika Biyani, Tomoko Tsuchihashi, Yuzuru Takamura, Hiromi Ushijima, Eiichi Tamiya and Manish Biyani

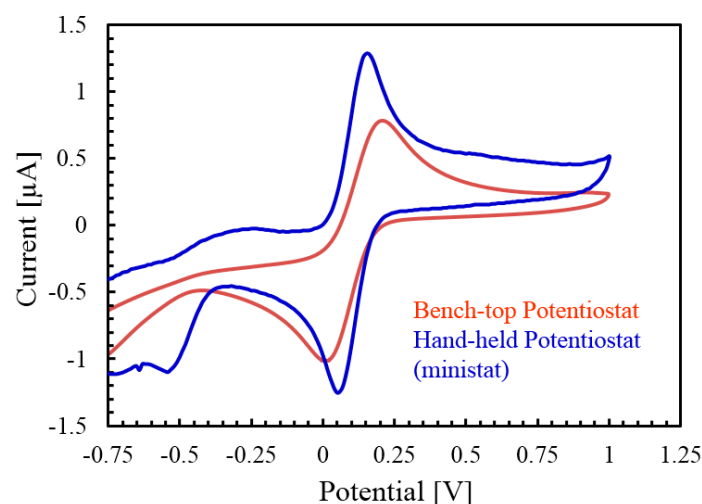

**Figure S1.** A cyclic voltammogram of the conventional bench-top unit and our hand-held potentiostat in 0.5 M Na<sub>2</sub>SO<sub>4</sub> solution containing 2.0 mM hexacyanoferrate.

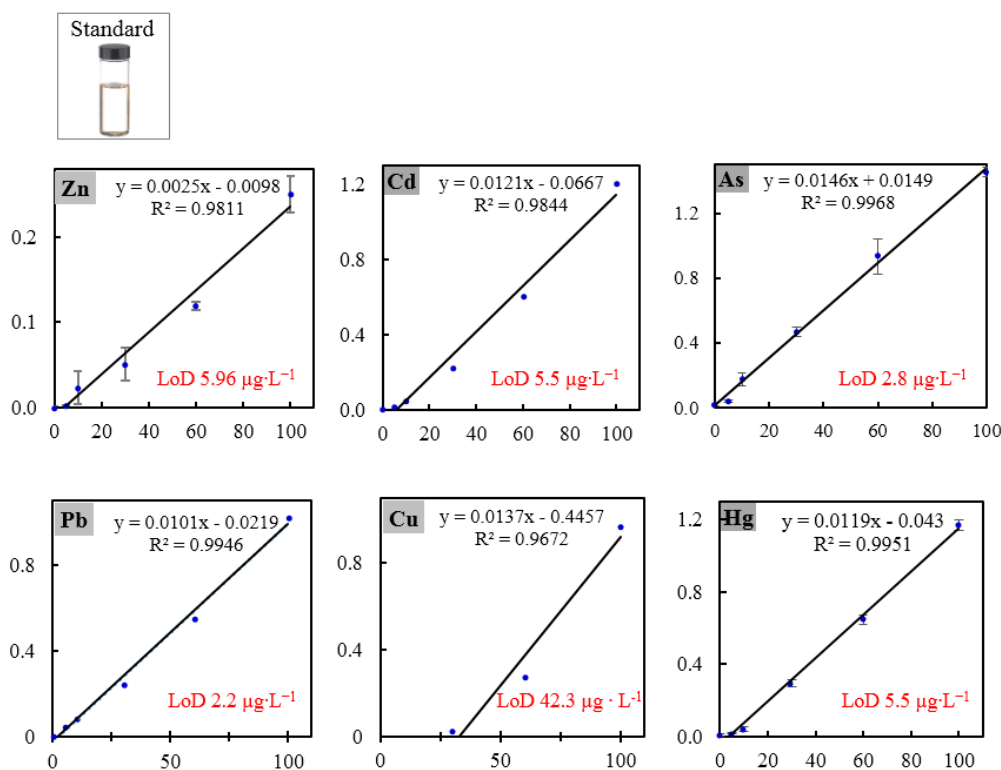

**Figure S2.** Calibration curves for the simultaneous electrochemical detection of zinc, cadmium, lead, and copper using a carbon DEP chip (C-DEP) and arsenic, and mercury using a gold DEP chip (Au-DEP) in standard solutions. The X-axis and Y-axis represent the concentrations of metals (μg·L<sup>-1</sup>) and calculated peak current heights (μA), respectively. The data are the averages of four to six independent experiments. LoD: Limit of detection.

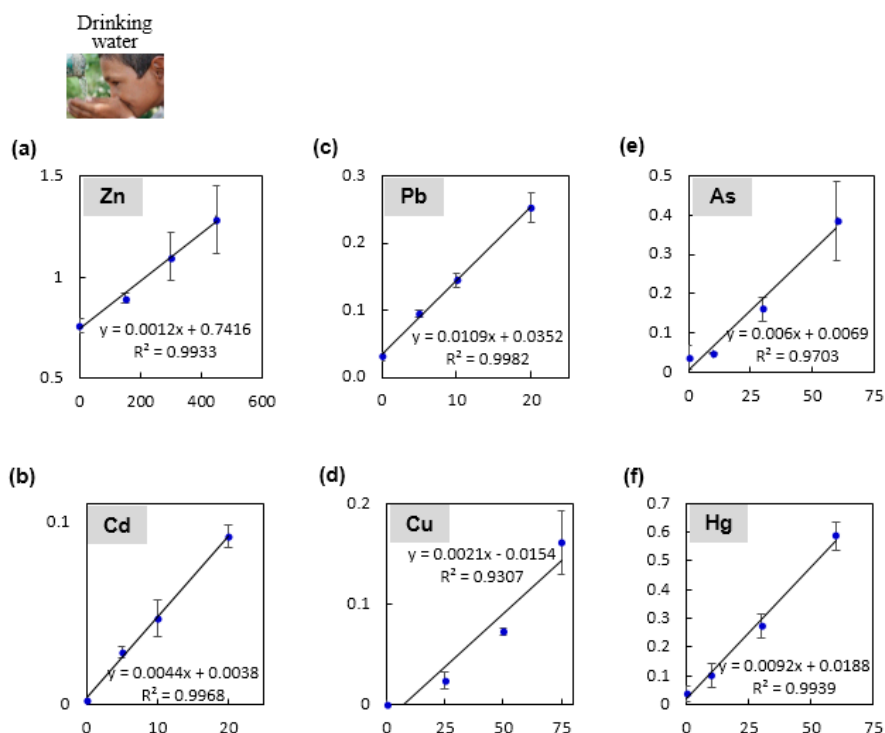

**Figure S3.** Calibration curves for the simultaneous detection of zinc (a); cadmium (b); lead (c); copper (d); arsenic (e); and mercury (f) in real drinking groundwater sample. The X-axis and Y-axis represent the concentrations of the metals ( $\mu\text{g}\cdot\text{L}^{-1}$ ) and the calculated peak current height ( $\mu\text{A}$ ), respectively. The data are the averages of four to six independent experiments.

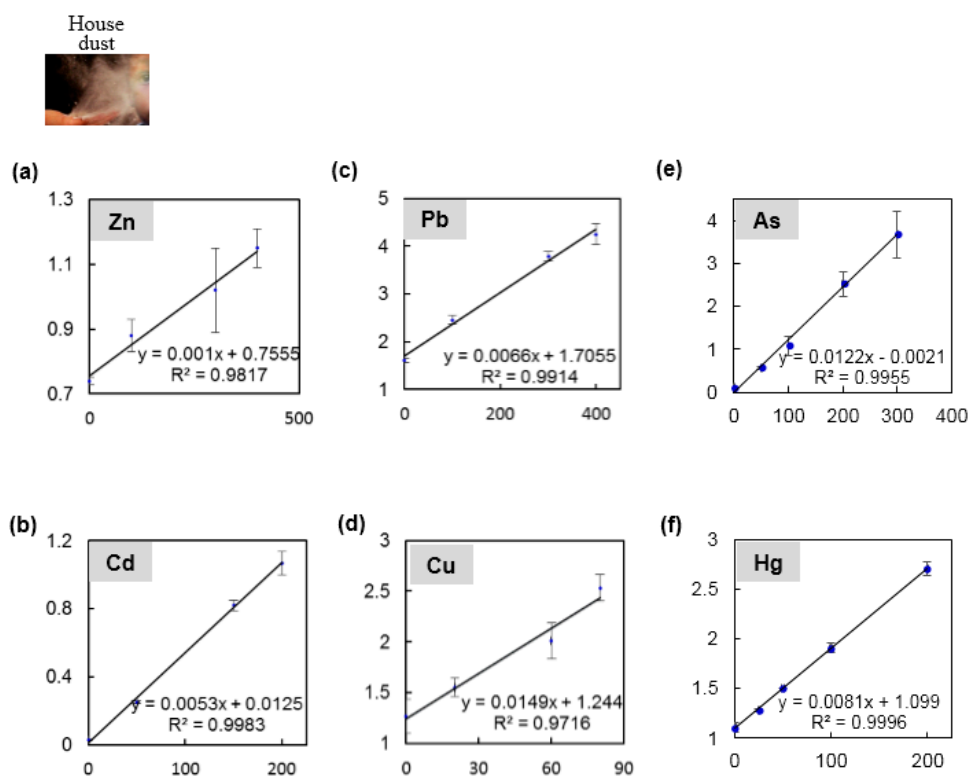

**Figure S4.** Calibration curves for the simultaneous detection of zinc (a); cadmium (b); lead (c); copper (d); arsenic (e); and mercury (f) in real house dust sample. The X-axis and Y-axis represent the concentrations of the metals ( $\mu\text{g}\cdot\text{L}^{-1}$ ) and the calculated peak current height ( $\mu\text{A}$ ), respectively. The data are the averages of four to six independent experiments.

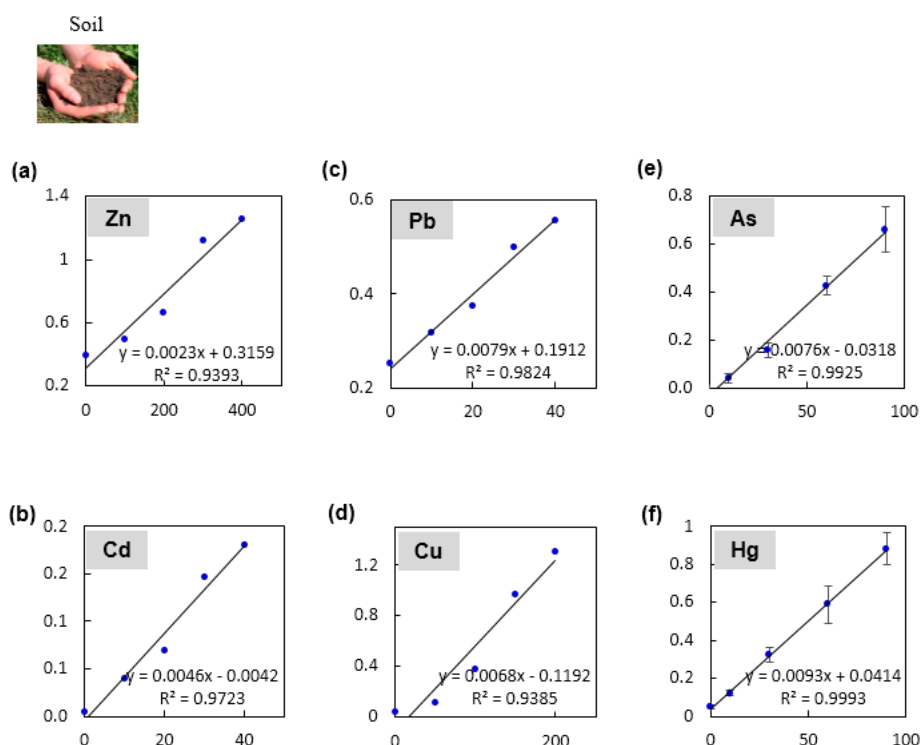

**Figure S5.** Calibration curves for the simultaneous detection of zinc (a); cadmium (b); lead (c); copper (d); arsenic (e); and mercury (f) in real garden soil sample. The X-axis and Y-axis represent the concentrations of the metals ( $\mu\text{g}\cdot\text{L}^{-1}$ ) and the calculated peak current height ( $\mu\text{A}$ ), respectively. The data are the averages of four to six independent experiments.

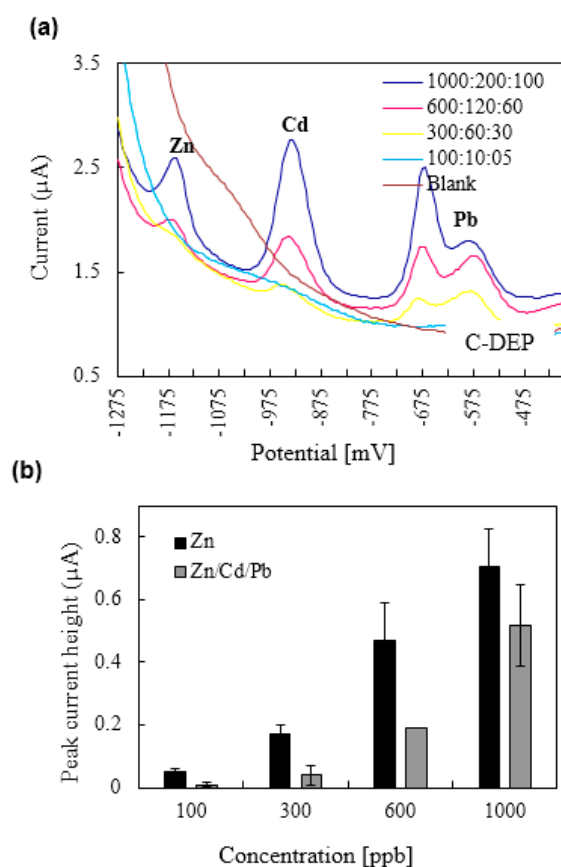

**Figure S6.** Simultaneous detection of heavy metals using a carbon DEP chip. DP voltammograms (a) and the corresponding interference effect (b) of zinc in the presence of cadmium and lead.

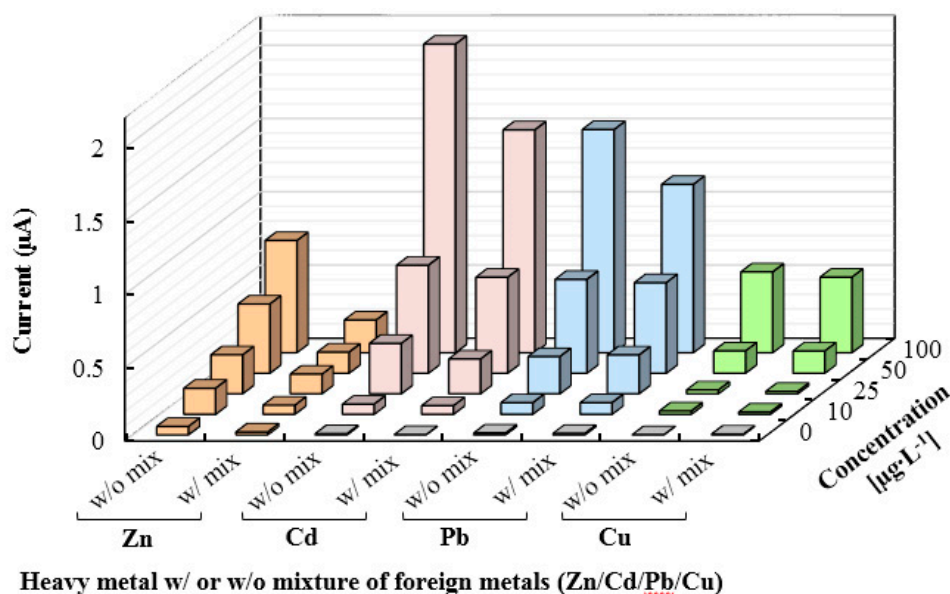

**Figure S7.** The cross-interference effect on carbon DEP chip in electrochemical co-detection of heavy metals. Individual heavy metals including zinc, cadmium, lead and copper were measured with and without the successive additions of a mixture of other heavy metals.

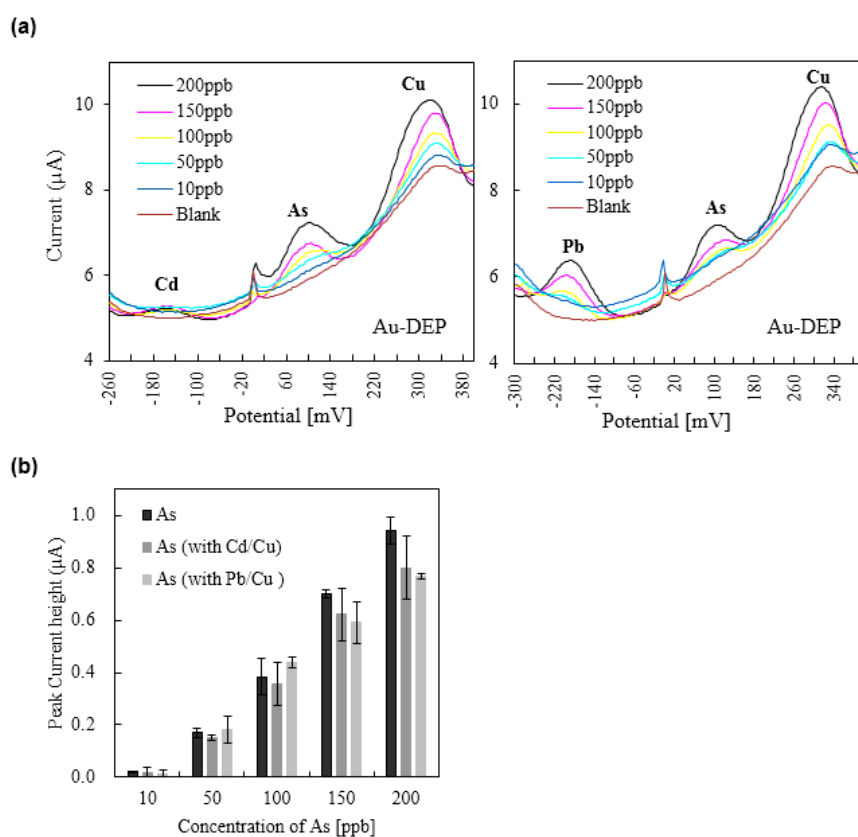

**Figure S8.** Simultaneous detection of heavy metals using the gold DEP chip. The DP voltammograms (a) and corresponding interference effect (b) of arsenic in the presence of cadmium and copper (top left) and lead and copper (top right).

**Table S1.** DPV parameters for the detection of different heavy metals on carbon and gold DEP chips

| DPV Parameters               | Carbon DEP-Chip |        |        |        |                           | Gold DEP-Chip |      |           |
|------------------------------|-----------------|--------|--------|--------|---------------------------|---------------|------|-----------|
|                              | Zn              | Cd     | Pb     | Cu     | Zn/Cd/Pb/Cu               | As            | Hg   | As/Hg     |
| Peak potential (V)           | −1.423          | −1.178 | −0.889 | −0.321 | −1.428/−1.109/−0.887/−0.3 | 0.092         | 0.45 | 0.06/0.42 |
| <b>Potential</b>             |                 |        |        |        |                           |               |      |           |
| Beginning potential (mV)     | −1500           | −1300  | −1300  | −490   | −1500                     | −140          | 300  | −100      |
| End potential (mV)           | −1200           | −900   | −700   | −130   | 250                       | 165           | 600  | 500       |
| Step amplitude (mV)          | 4               | 4      | 4      | 4      | 4                         | 10            | 10   | 10        |
| Pulse amplitude (mV)         | 50              | 50     | 50     | 50     | 50                        | 50            | 50   | 50        |
| <b>Time</b>                  |                 |        |        |        |                           |               |      |           |
| Pulse period (ms)            | 200             | 200    | 200    | 200    | 200                       | 200           | 100  | 100       |
| Pulse width (ms)             | 50              | 50     | 50     | 50     | 50                        | 50            | 40   | 40        |
| Sampling width (ms)          | 16              | 16     | 16     | 16     | 16                        | 16            | 2    | 2         |
| Scan rate mV/s               | 20              | 20     | 20     | 20     | 20                        | 100           | 100  | 100       |
| <b>Deposition Conditions</b> |                 |        |        |        |                           |               |      |           |
| E1 (mV)                      | −1600           | −1400  | −1400  | −1400  | −1600                     | −400          | 200  | −250      |
| T1 (s)                       | 300             | 300    | 300    | 300    | 300                       | 120           | 120  | 120       |
| <b>Range</b>                 |                 |        |        |        |                           |               |      |           |
| Fixed                        | 1               | 1      | 1      | 1      | 1                         | 1             | 1    | 1         |

**Table S2.** Comparative features of ICP-MS and DEP chip methods.

|                         | ICP-MS                    | Our (DEP-On-Go) System |
|-------------------------|---------------------------|------------------------|
| Set-up cost             | \$179,000–448,000         | \$2000 or less         |
| Running cost per sample | \$20                      | \$1–2                  |
| Sample analysis time    | ~5 min                    | Few minutes (1–5 min)  |
| Analytical procedure    | Complex                   | Easy                   |
| Portability             | No                        | Yes                    |
| Contamination           | High                      | No/Less                |
| Sample preparation      | Multi-step                | Simple                 |
| Sample volume required  | mL                        | μL                     |
| Detection limit         | extremely sensitive (ppt) | sensitive (sub-ppb)    |
